# Supplementary material for: Synthesis and crystal structures of a copper(ii) dinuclear complex and zinc(ii) coordination polymers as materials for efficient oxidative desulfurization of dibenzothiophene
Source: Royal Society of Chemistry journal article supplement (doi:10.1039/c9nj01456j), 2019-01-01
Supplement: c9nj01456j1.pdf [file c9nj01456j1.pdf]

## Synthesis and crystal structures of copper(II) dinuclear complex and zinc(II) coordination polymer as materials for efficient oxidative desulfurization of dibenzothiophene

Adedibu C. Tella<sup>a,\*</sup>, Adetola C. Oladipo<sup>a</sup>, Vincent O. Adimula<sup>a</sup>, Olanrewaju A. Ameen<sup>a</sup>, Susan A. Bourne<sup>b</sup> and Adeniyi S. Ogunlaja<sup>c,\*</sup>

<sup>a</sup>Department of Chemistry, P.M.B.1515, University of Ilorin, Ilorin, Kwara State, Nigeria,

<sup>b</sup>Centre for Supramolecular Chemistry Research, Department of Chemistry, University of Cape Town, Rondebosch 7701, South Africa,

<sup>c</sup>Department of Chemistry, Nelson Mandela University, PO Box 77000, Port Elizabeth, 6031, South Africa,  
e-mail: [ac\\_tella@yahoo.co.uk](mailto:ac_tella@yahoo.co.uk) and [adeniyi.ogunlaja@mandela.ac.za](mailto:adeniyi.ogunlaja@mandela.ac.za)

### Supplementary Data

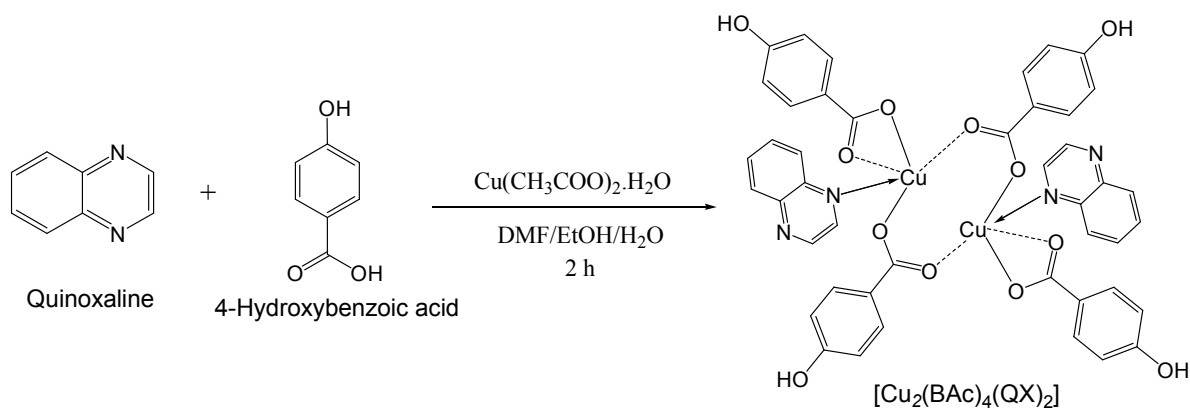

Scheme S1 Reaction scheme for the synthesis of  $[\text{Cu}_2(\text{BAC})_4(\text{QX})_2]$

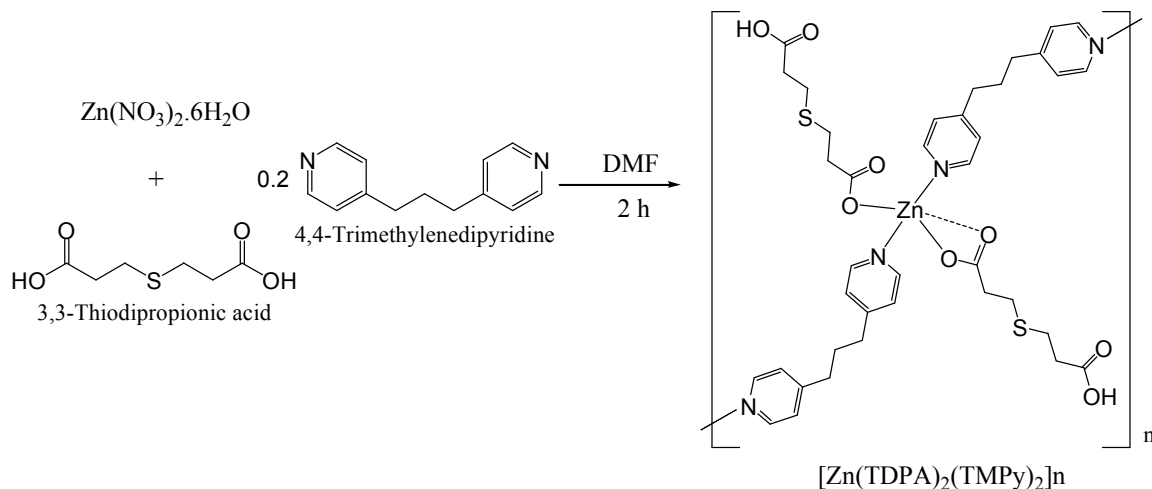

Scheme S2 Reaction scheme for  $[\text{Zn}(\text{TDPA})_2(\text{TMPy})_2]_n$

## 1.0 Adsorption experiments

In a typical adsorption experiment, various masses of adsorbent,  $[\text{Zn}(\text{TDPA})_2(\text{TMPy})_2]_n$ , were brought into contact with DBTO solution (930 mg/L and 3 mL acetonitrile/ n-hexane (1:1)) in a glass vial and stirred at room temperature to attain the adsorption equilibrium. Adsorption progress was monitored by measuring the amount of unadsorbed DBTO *via* the use of GC-FID. Adsorption capacity,  $q_e$  ( $\text{mg g}^{-1}$ ), was obtained using Eqn 1.

$$q_e = \frac{V(C_o - C_e)}{W} \quad (1)$$

( $C_o$ ) is the initial concentration ( $\text{mg L}^{-1}$ ), ( $C_e$ ) is equilibrium concentration ( $\text{mg L}^{-1}$ ), ( $W$ ) is the weight of  $[\text{Zn}(\text{TDPA})_2(\text{TMPy})_2]_n$  (g) and ( $V$ ) volume of solvent in litres). Adsorption kinetics, isotherm and selectivity of DBTO, were also calculated. For selectivity coefficient, Eqn 2 was employed:

$$\alpha_{a-b} = (q_a/q_b) \div (C_{e,a}/C_{e,b}) \quad (2)$$

where  $q_a$  and  $q_b$  are adsorption capacities ( $\text{mg g}^{-1}$ ) of compound a and reference compound b at equilibrium, respectively.  $C_{e,a}$  and  $C_{e,b}$  ( $\text{mg L}^{-1}$ ) are equilibrium concentrations of compound a and reference compound b, respectively [1]. Naphthalene (NAP) was selected as a reference compound as it is a predominant poly aromatic hydrocarbon (PAH) present in fuel.

## 2.0 Computational Methods

To accelerate the adsorption calculation, a unit of the Coordination polymer,  $[\text{Zn}(\text{TDPA})_2(\text{TMPy})_2]_n$ , was extracted for binding energy (BE) calculations at LanL2DZ /BY3LP level using the Gaussian program (calculated at 298K) [2-4]. The BEs could be defined as shown below (Eqn 3):

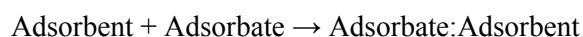

$$\text{BE} = E_{(\text{adsorbent:adsorbate})} - E_{(\text{adsorbent})} - E_{(\text{adsorbate})} \quad (3)$$

where  $E_{(\text{adsorbent:adsorbate})}$  is the energy of the  $[\text{Zn}(\text{TDPA})_2(\text{TMPy})_2]_n$ -DBTO sorption system at the equilibrium state, while  $E_{(\text{adsorbent})}$  and  $E_{(\text{adsorbate})}$  are the total energy of  $[\text{Zn}(\text{TDPA})_2(\text{TMPy})_2]_n$  and the DBTO, respectively.

Further ab-initio calculations such as HOMO energy ( $E_{\text{HOMO}}$ ), LUMO energy ( $E_{\text{LUMO}}$ ), LUMO-HOMO energy gap ( $\Delta E$ ), hardness ( $\eta$ ), softness ( $\sigma$ ), electronegativity ( $\chi$ ) and chemical potential ( $\mu$ ),  $I = -E_{\text{HOMO}}$ ,  $A = -E_{\text{LUMO}}$  were calculated using equations 4-7:

$$\eta = \frac{I - A}{2} \quad (4)$$

$$\sigma = \frac{1}{\eta} \quad (5)$$

$$\chi = \frac{I + A}{2} \quad (6)$$

$$\mu = -\chi \quad (7)$$

First-order molecular hyperpolarizability ( $\beta_0$ ), dipole moment ( $\mu$ ) and polarizability ( $\alpha_0$ ) are modelled using the the equation below,

$$\mu = (\mu_x^2 + \mu_y^2 + \mu_z^2)^{1/2}$$

$$\alpha_0 = (\alpha_{xx} + \alpha_{yy} + \alpha_{zz})/3$$

$$\beta_0 = (\beta_x^2 + \beta_y^2 + \beta_z^2)^{1/2}$$

where,

$$\beta_x = \beta_{xxx} + \beta_{xyy} + \beta_{xzz}$$

$$\beta_y = \beta_{yyy} + \beta_{xxy} + \beta_{yzz}$$

$$\beta_z = \beta_{zzz} + \beta_{xxz} + \beta_{yyz}$$

**Table S1** Relevant crystal data and data collection summary

|                                     | [Cu <sub>2</sub> (BAC) <sub>4</sub> (QX) <sub>2</sub> ] (1)                    | [Zn(TDPA) <sub>2</sub> (TMPy) <sub>2</sub> ] <sub>n</sub> (2)                                           |
|-------------------------------------|--------------------------------------------------------------------------------|---------------------------------------------------------------------------------------------------------|
| Formula                             | C <sub>44</sub> H <sub>32</sub> Cu <sub>2</sub> N <sub>4</sub> O <sub>12</sub> | (C <sub>19</sub> H <sub>22</sub> N <sub>2</sub> O <sub>4</sub> SZn) <sub>n</sub> ·0.2(H <sub>2</sub> O) |
| Formula weight                      | 935.81                                                                         | 443.12                                                                                                  |
| Crystal system                      | Monoclinic                                                                     | Monoclinic                                                                                              |
| Space group                         | P 21/c (14)                                                                    | C 2/c                                                                                                   |
| a (Å)                               | 9.7035 (7)                                                                     | 18.8659 (13)                                                                                            |
| b (Å)                               | 18.8466(14)                                                                    | 13.3682 (9)                                                                                             |
| c (Å)                               | 10.6948(8)                                                                     | 17.1126(12)                                                                                             |
| α (°)                               | 90                                                                             | 90                                                                                                      |
| β (°)                               | 102.326(2)                                                                     | 107.432(3)                                                                                              |
| γ (°)                               | 90                                                                             | 90                                                                                                      |
| V (Å <sup>3</sup> )                 | 1910.8 (2)                                                                     | 4117.6 (5)                                                                                              |
| Z                                   | 2                                                                              | 8                                                                                                       |
| Temperature (K)                     | 173                                                                            | 300                                                                                                     |
| Crystal color                       | Blue                                                                           | Colourless                                                                                              |
| Crystal Shape                       | Prism                                                                          | Plate                                                                                                   |
| Crystal Size [mm]                   | 0.18 x 0.22 x 0.54                                                             | 0.19 x 0.32 x 0.41                                                                                      |
| F000                                | 956.0                                                                          | 1838.0                                                                                                  |
| Radiation (Å)                       | MoKa 0.71073                                                                   | MoKa 0.71073                                                                                            |
| h,k,l <sub>max</sub>                | 12, 25, 14                                                                     | 25, 17, 22                                                                                              |
| N <sub>ref</sub>                    | 4777                                                                           | 5153                                                                                                    |
| T <sub>min</sub> , T <sub>max</sub> | 0.759, 0.887                                                                   | 0.760, 0.853                                                                                            |
| Max. and min. transmission          | 0.887 and 0.759                                                                | 0.853 and 0.760                                                                                         |
| Θ <sub>max</sub> (°)                | 28.387                                                                         | 28.364                                                                                                  |
| Data completeness                   | 0.999                                                                          | 0.998                                                                                                   |
| N <sub>par</sub>                    | 288                                                                            | 264                                                                                                     |
| R(reflections)                      | 0.0282(3966)                                                                   | 0.0702 (3616)                                                                                           |
| wR <sub>2</sub> (reflections)       | 0.0645(4777)                                                                   | 0.2455 (5153)                                                                                           |

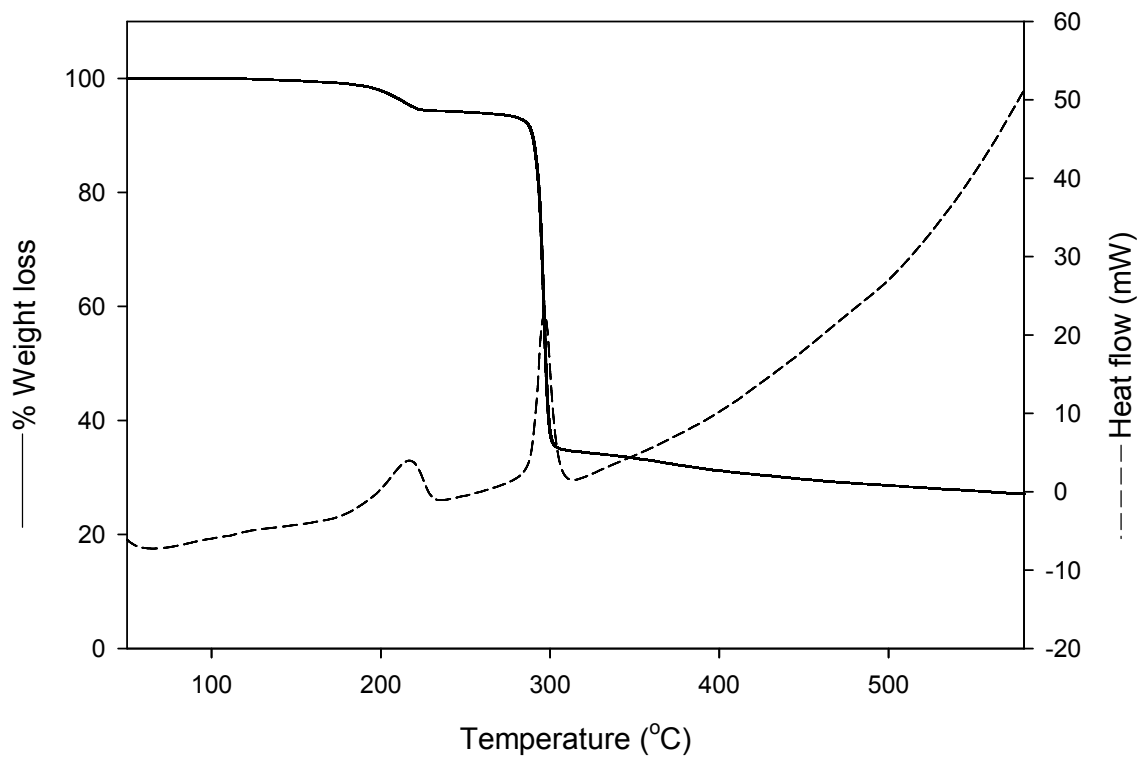

**Fig. S1.** TGA-DSC profiles of  $[\text{Cu}_2(\text{BAc})_4(\text{QX})_2]$

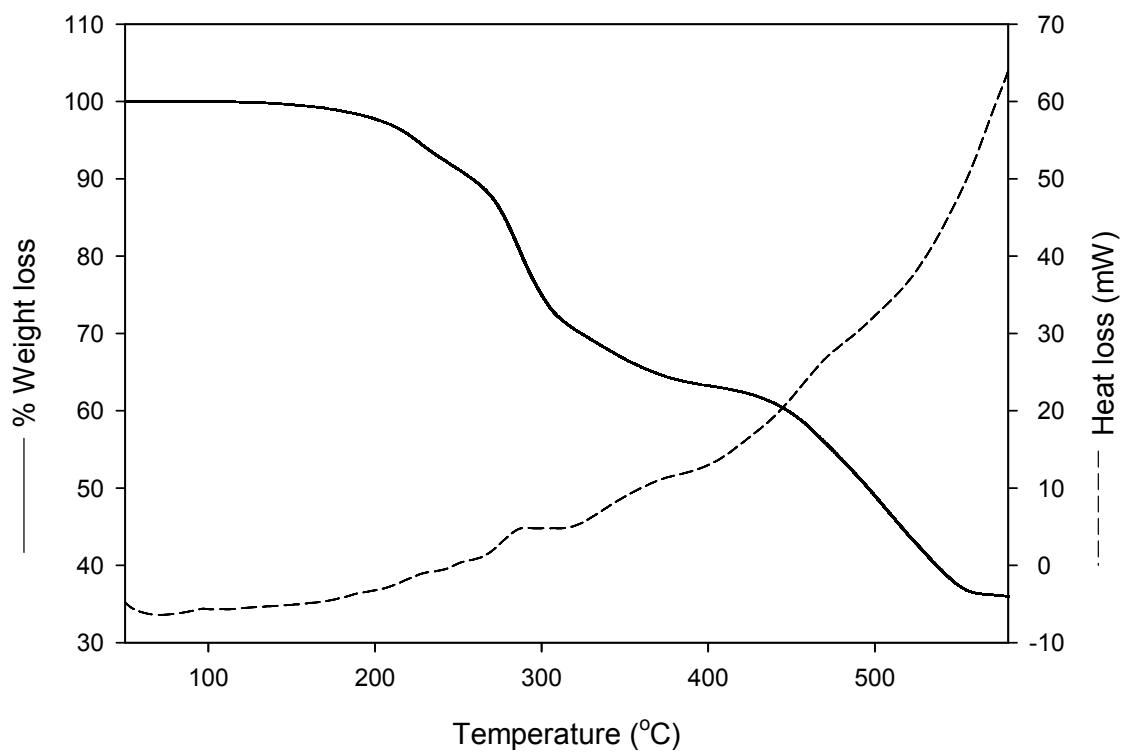

**Fig. S2.** TGA-DSC profiles of  $[\text{Zn}(\text{TDPA})_2(\text{TMPy})_2]_n$

A

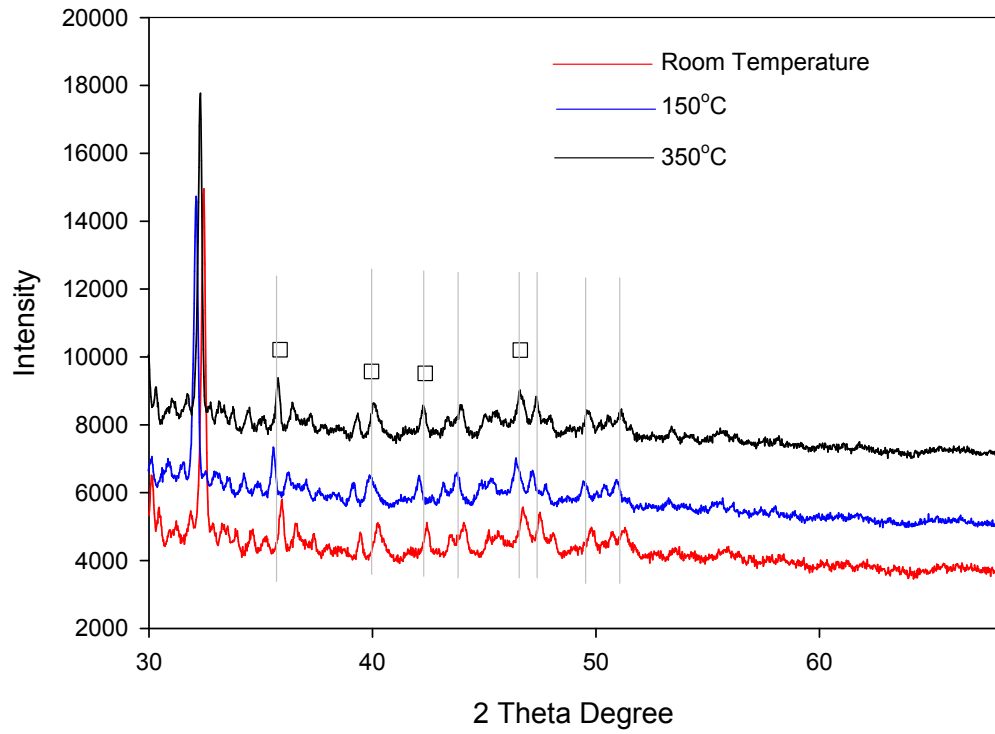

B

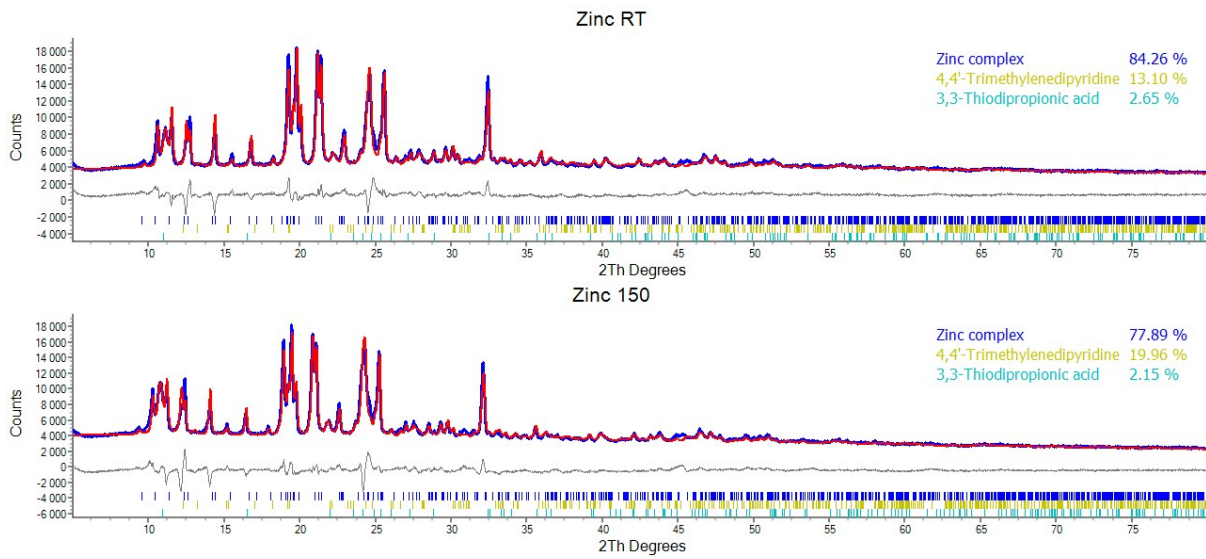

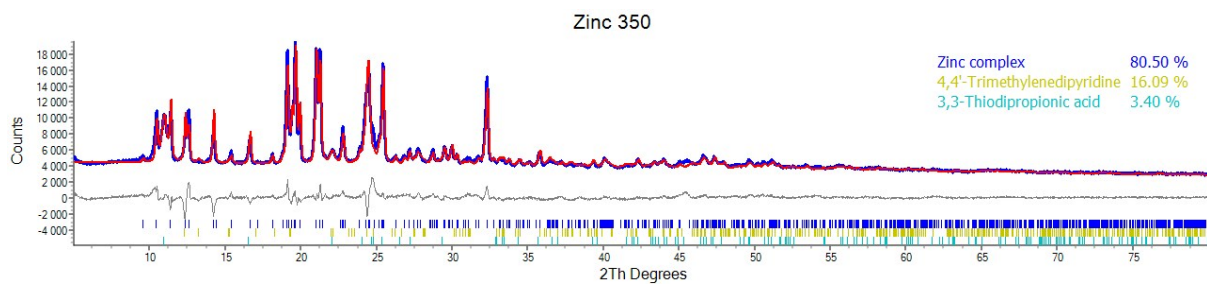

**Fig. S3.** (a) PXRD patterns of  $[\text{Zn}(\text{TDPA})_2(\text{TMPy})_2]_n$  at room temperature; 150°C and 350°C under  $\text{N}_2$  atmosphere ( $2\theta=30\text{-}70$ ), (b) Phase quantification of  $[\text{Zn}(\text{TDPA})_2(\text{TMPy})_2]_n$  at room temperature; 150°C and 350°C.

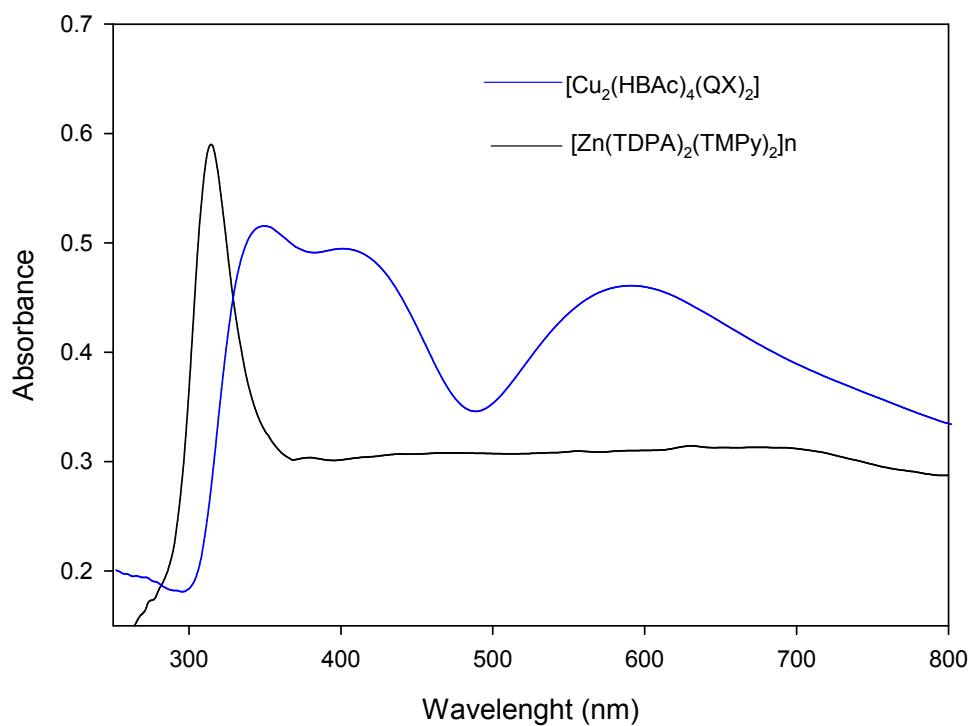

**Fig. S4.** Solid state UV-Vis spectra of  $[\text{Cu}_2(\text{BAC})_4(\text{QX})_2]$  and  $[\text{Zn}(\text{TDPA})_2(\text{TMPy})_2]_n$

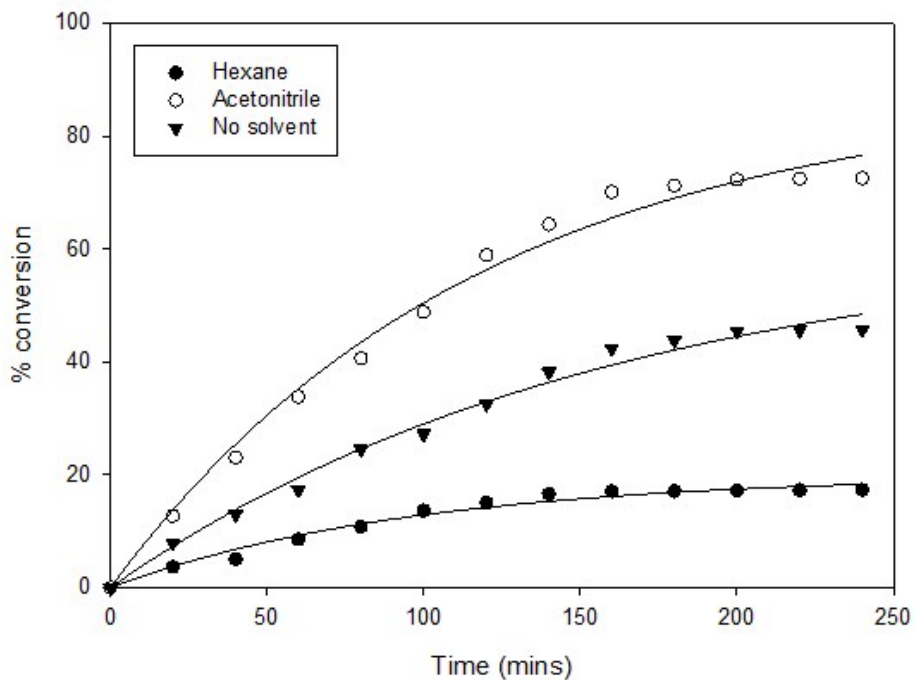

**Fig. S5.** Effect of solvent (acetonitrile and hexane) in the oxidation of DBT.  $[H_2O_2] = 50$  mmol;  $[Cu_2(BAc)_4(QX)_2] = 0.05$  mmol;  $[DBT] = 10$  mmol; temp.:  $70^\circ C$ .

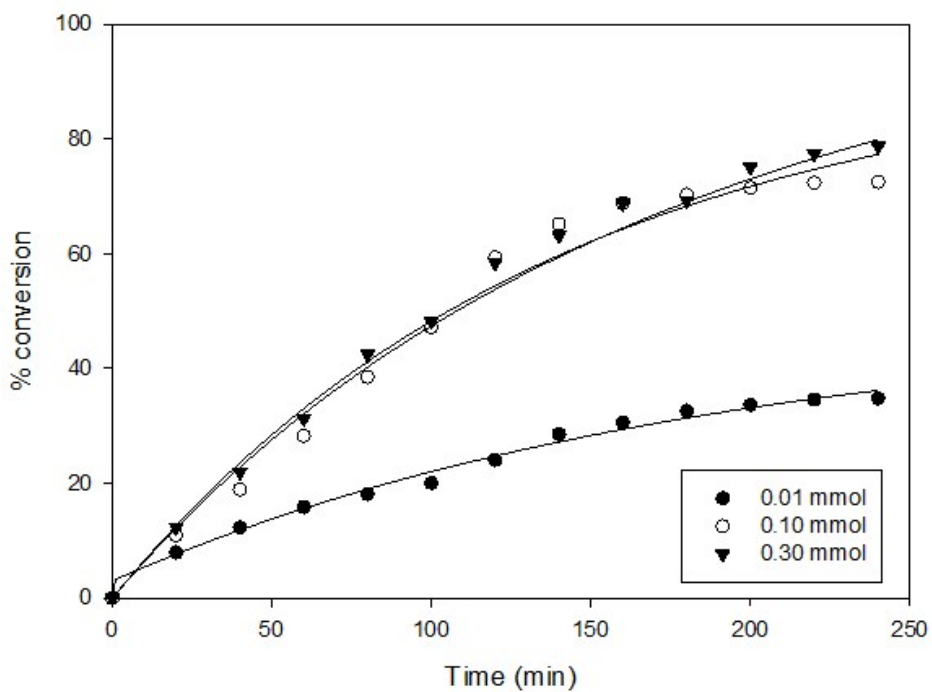

**Fig. S6.** Effect of  $[Cu_2(BAc)_4(QX)_2]$  in the oxidation of DBT.  $[H_2O_2] = 50$  mmol;  $[DBT] = 10$  mmol; temp.:  $70^\circ C$ ; Acetonitrile= 10 mL



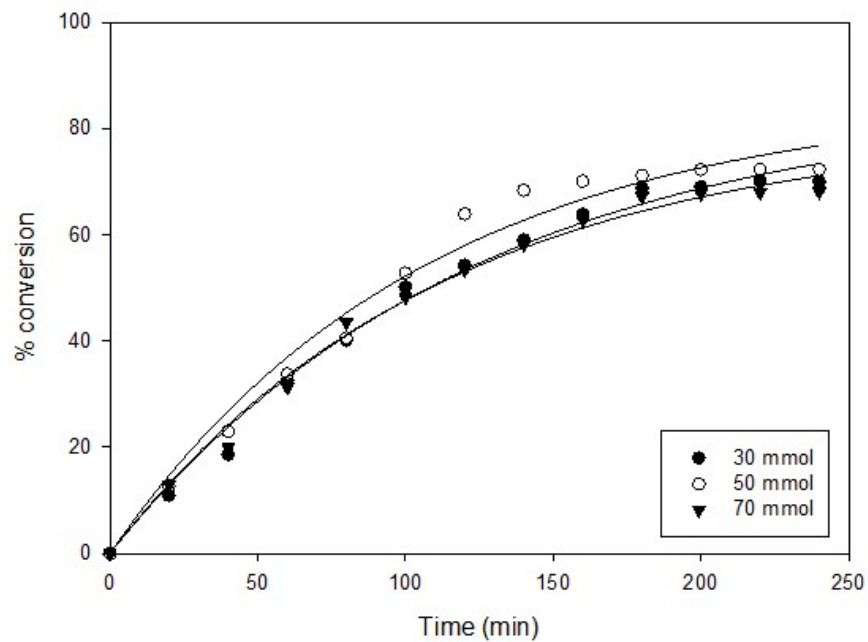

**Fig. S7.** Effect of oxidant ( $\text{H}_2\text{O}_2$ ) in the oxidation of DBT.  $[\text{Cu}_2(\text{BAC})_4(\text{QX})_2] = 0.05$  mmol;  $[\text{DBT}] = 10$  mmol; temp.:  $70^\circ\text{C}$ ; Acetonitrile = 10 mL

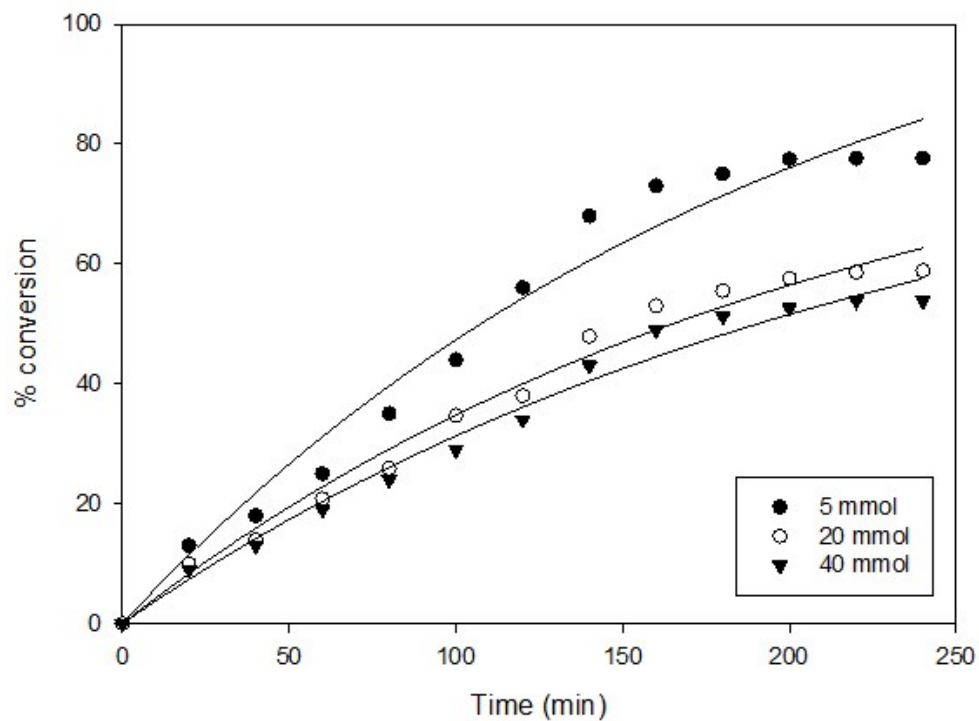

**Fig. S8.** Effect of DBT in the oxidation reaction.  $[\text{H}_2\text{O}_2] = 50$  mmol;  $[\text{Cu}_2(\text{BAC})_4(\text{QX})_2] = 0.05$  mmol; temp.:  $70^\circ\text{C}$ ; Acetonitrile = 10 mL

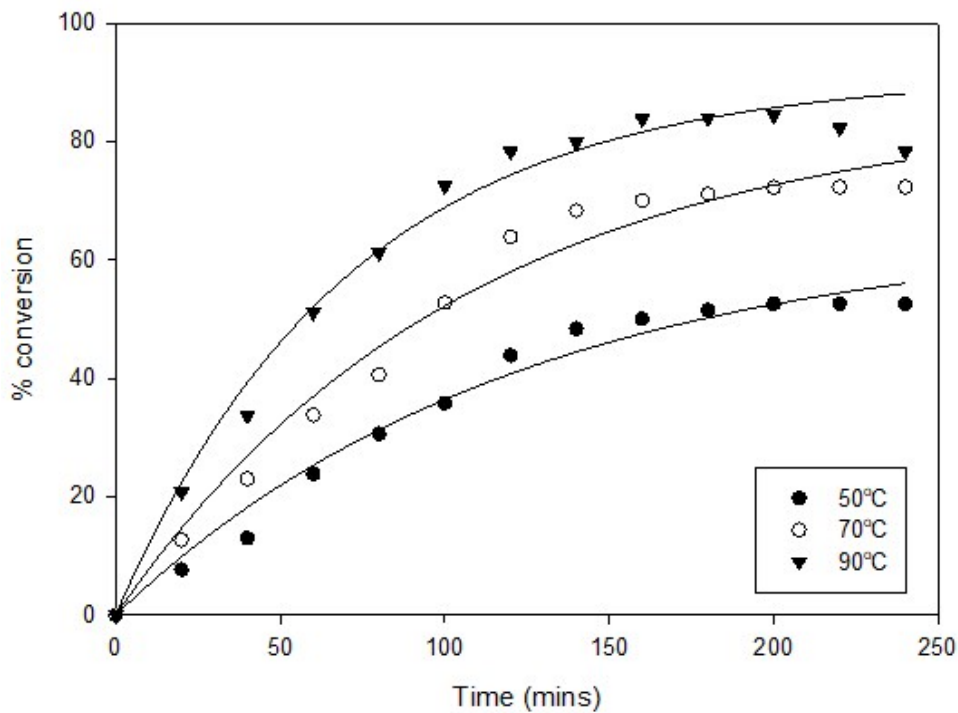

**Fig. S9.** Effect of temperature on the oxidation of DBT.  $[\text{H}_2\text{O}_2] = 50 \text{ mmol}$ ;  $[\text{Cu}_2(\text{BAC})_4(\text{QX})_2] = 0.05 \text{ mmol}$ ;  $[\text{DBT}] = 10 \text{ mmol}$ ; Acetonitrile = 10 mL.

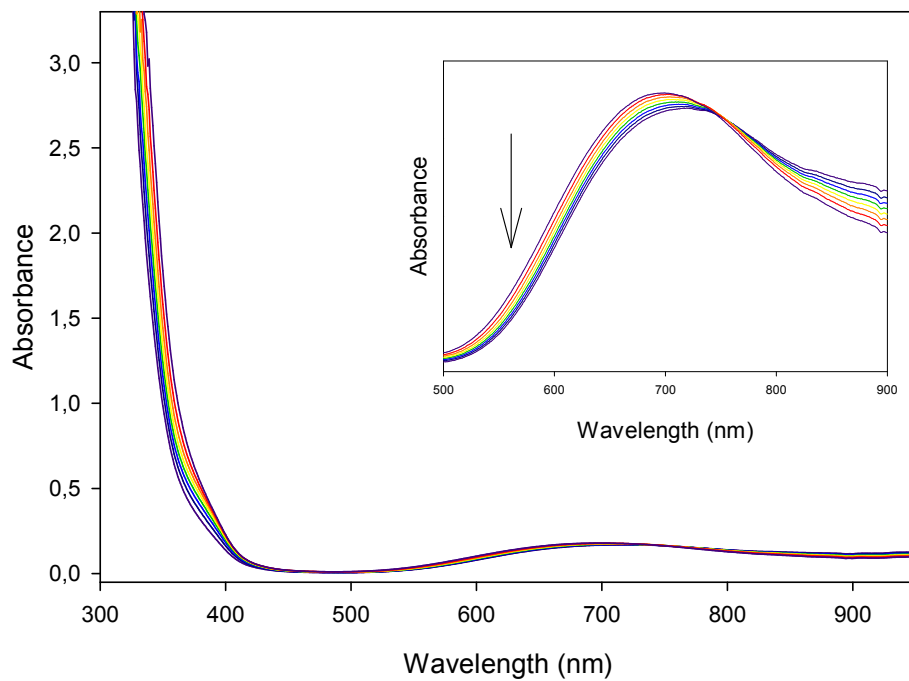

**Fig. S10.** UV-Vis studies showing the reaction between  $[\text{Cu}_2(\text{BAC})_4(\text{QX})_2]$  and  $\text{H}_2\text{O}_2$ ,  $[\text{Cu}_2(\text{BAC})_4(\text{QX})_2]$ - $\text{H}_2\text{O}_2$  adduct]. Inset: Absorption spectra showing the decrease in d-d band region as reaction progresses.

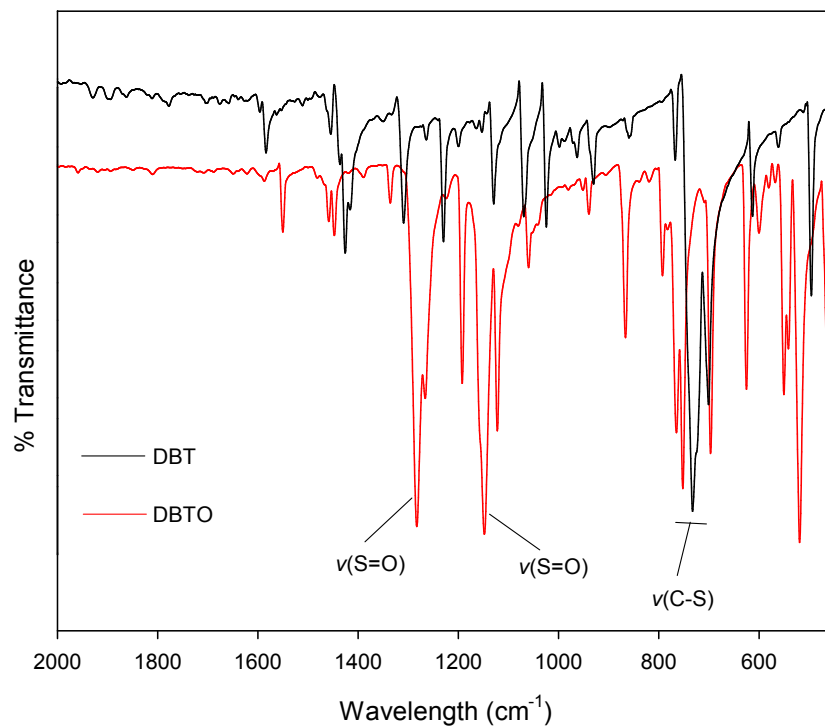

Fig. S11 FT-IR of Dibenzothiophene (DBT) and dibenzothiophene sulfoxide (DBTO).

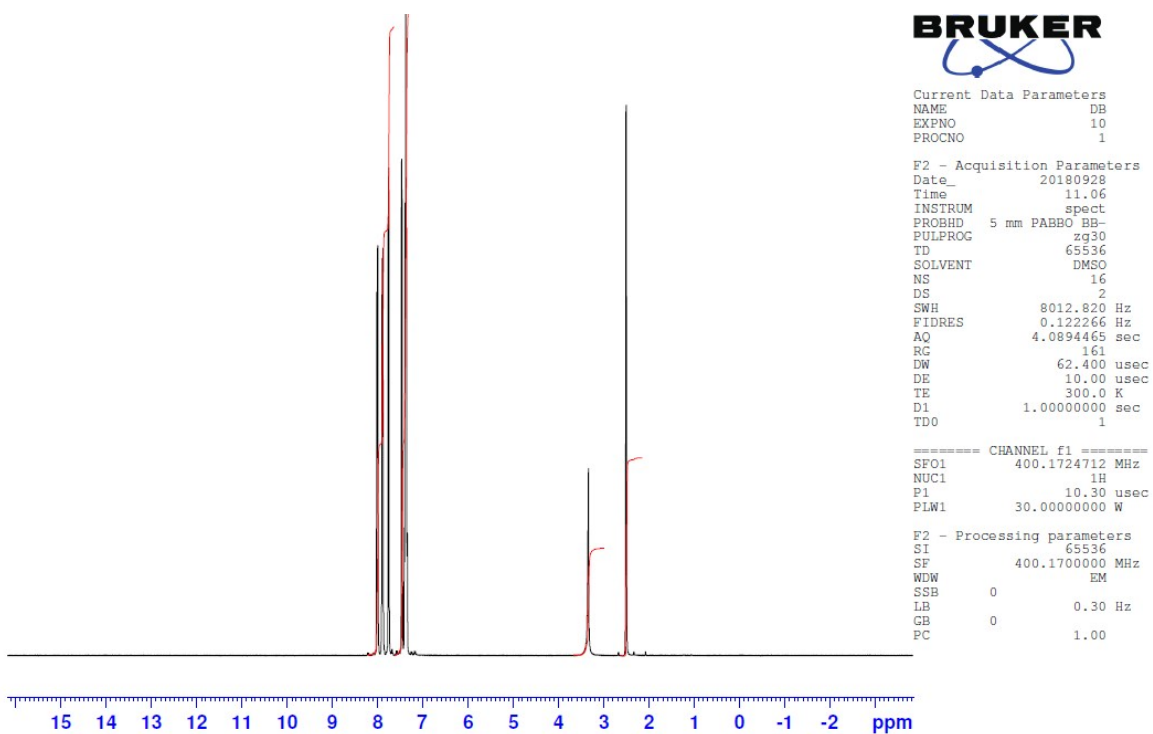

Fig. S12 <sup>1</sup>H NMR spectra of dibenzothiophene (DBT).

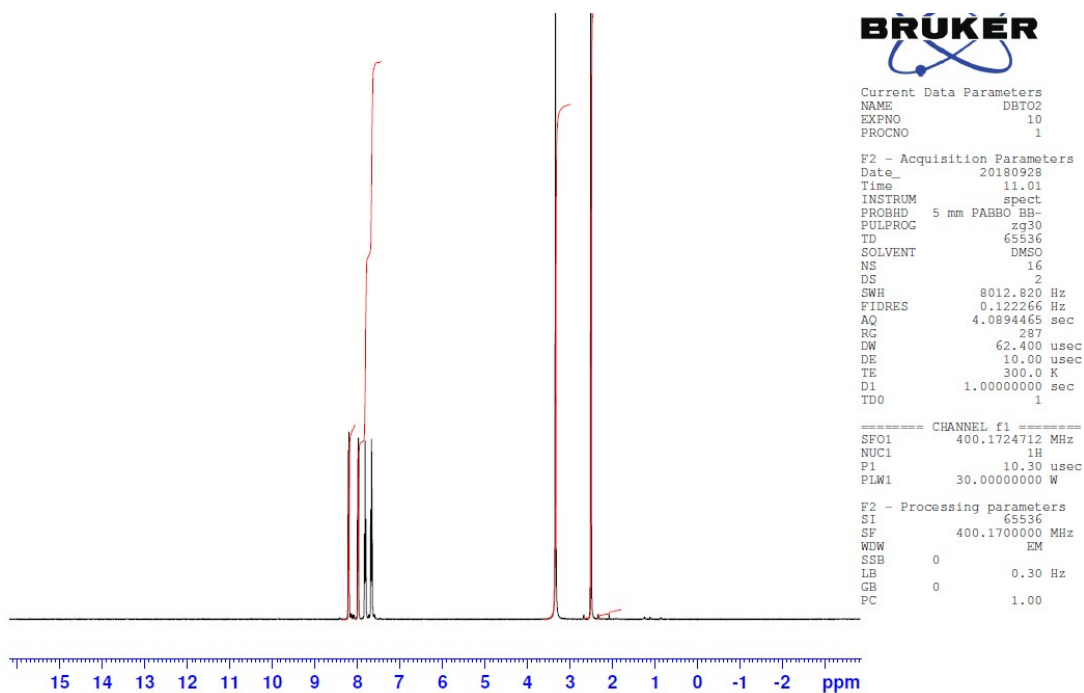

**Fig. S13**  $^1\text{H}$  NMR spectra of dibenzothiophene sulfoxide (DBTO).

**Table S2** The calculated dipole moment ( $\mu$ ), mean polarizability ( $\alpha_0$ ), mean first-order molecular hyperpolarizability ( $\beta_0$ ), HOMO–LUMO (eV), electronegativity (eV), hardness (eV), and softness ( $\text{eV}^{-1}$ ) values of  $[\text{Zn}(\text{TDPA})_2(\text{TMPy})_2]_n$ .

|                                           | $[\text{Zn}(\text{TDPA})_2(\text{TMPy})_2]_n$ |
|-------------------------------------------|-----------------------------------------------|
| First-order molecular hyperpolarizability |                                               |
| $\beta_{xxx}$                             | 751.16                                        |
| $\beta_{xyy}$                             | 2407.03                                       |
| $\beta_{xzz}$                             | -198.72                                       |
| $\beta_{yyy}$                             | 9020.34                                       |
| $\beta_{xxy}$                             | 500.76                                        |
| $\beta_{yyz}$                             | 479.65                                        |
| $\beta_{zzz}$                             | -223.76                                       |
| $\beta_{xxz}$                             | -589.29                                       |
| $\beta_{yyz}$                             | -1888.09                                      |
| $\beta_0$ ( $\times 10^{-30}$ esu)        | 10773.57                                      |
| Dipole moment                             |                                               |

|                |         |
|----------------|---------|
| $\mu_x$        | 2.05    |
| $\mu_y$        | 55.20   |
| $\mu_z$        | -27.80  |
| M              | 61.84   |
| Polarizability |         |
| $\alpha_{xx}$  | -365.90 |
| $\alpha_{xy}$  | 235.65  |
| $\alpha_{yy}$  | 212.91  |
| $\alpha_{xz}$  | 76.97   |
| $\alpha_{yz}$  | -136.27 |
| $\alpha_{zz}$  | -380.85 |
| A              | -177.94 |
| I              | 4.44    |
| A              | 3.23    |
| X              | 3.84    |
| H              | 0.60    |
| $\Sigma$       | 1.65    |

**Table S3** Partial charge difference of some atoms in  $[\text{Zn}(\text{TDPA})_2(\text{TMPy})_2]_n$ , DBT and DBTO before and after interaction

| $[\text{Zn}(\text{TDPA})_2(\text{TMPy})_2]$ |       | $[\text{Zn}(\text{TDPA})_2(\text{TMPy})_2]_n$ |       | $[\text{Zn}(\text{TDPA})_2(\text{TMPy})_2]$ |       | DBTO |      | DBT |      |
|---------------------------------------------|-------|-----------------------------------------------|-------|---------------------------------------------|-------|------|------|-----|------|
| n                                           |       | DBT                                           |       | n-DBTO                                      |       |      |      |     |      |
| O                                           | -0.50 | O                                             | -0.49 | O                                           | -0.49 | -    | -    | -   | -    |
| O                                           | -0.50 | O                                             | -0.50 | O                                           | -0.50 | -    | -    | -   | -    |
| O                                           | -0.60 | O                                             | -0.56 | O                                           | -0.56 | -    | -    | -   | -    |
| O                                           | -0.41 | O                                             | -0.43 | O                                           | -0.43 | -    | -    | -   | -    |
| Zn                                          | 1.15  | Zn                                            | 0.95  | Zn                                          | 0.94  | -    | -    | -   | -    |
| Zn                                          | 0.90  | Zn                                            | 0.89  | Zn                                          | 0.89  | -    | -    | -   | -    |
| -                                           | -     | S                                             | 0.20  | S                                           | 0.40  | S    | 1.04 | S   | 0.29 |
| -                                           | -     | -                                             | -     | O                                           | -0.61 | O    | 0.92 | -   | -    |

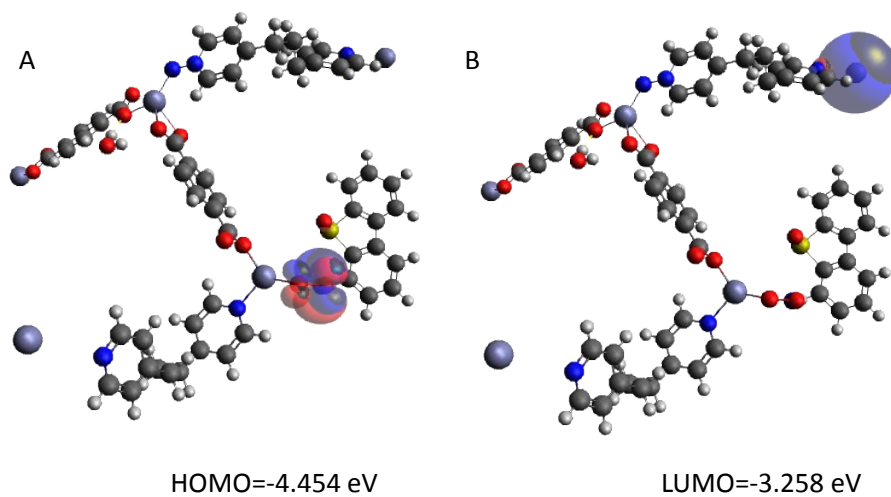

**Fig. S14.** Optimized geometry of a unit of  $[\text{Zn}(\text{TDPA})_2(\text{TMPy})_2]_n$  and DBTO adduct with respective (A) HOMO and (B) LUMO positions.

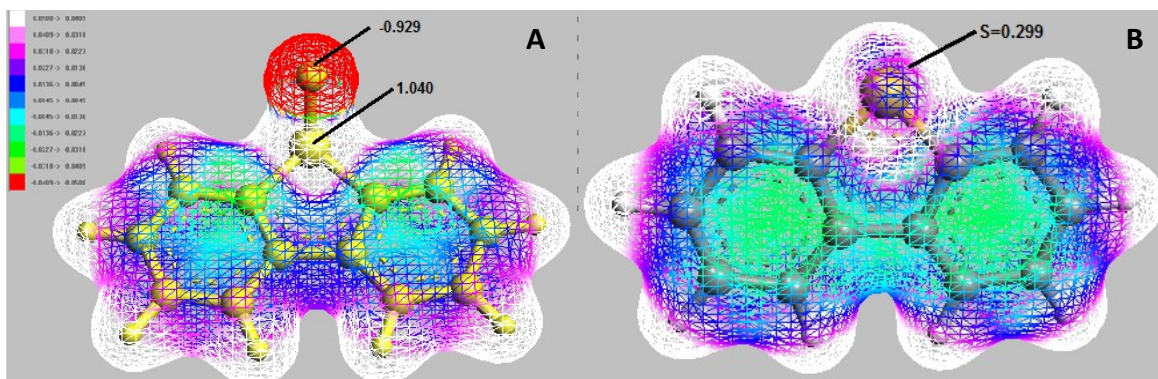

**Fig. S15.** Electrostatic potential mapping of sulfur and oxygen atoms on DBT and DBTO.

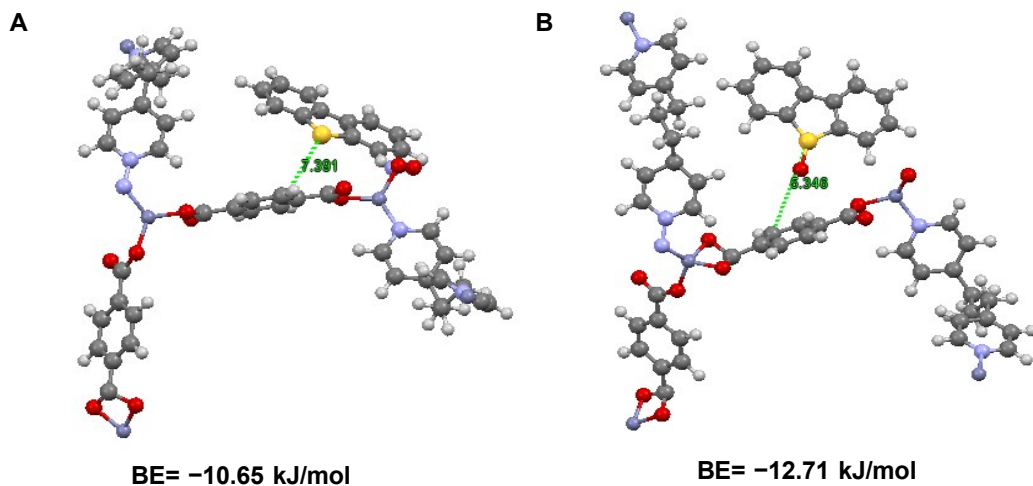

**Fig. S16.** Adsorption interaction conformations and binding energies (BEs) of (a) DBT and (b) DBTO with  $[\text{Zn}(\text{TDPA})_2(\text{TMPy})_2]_n$ .

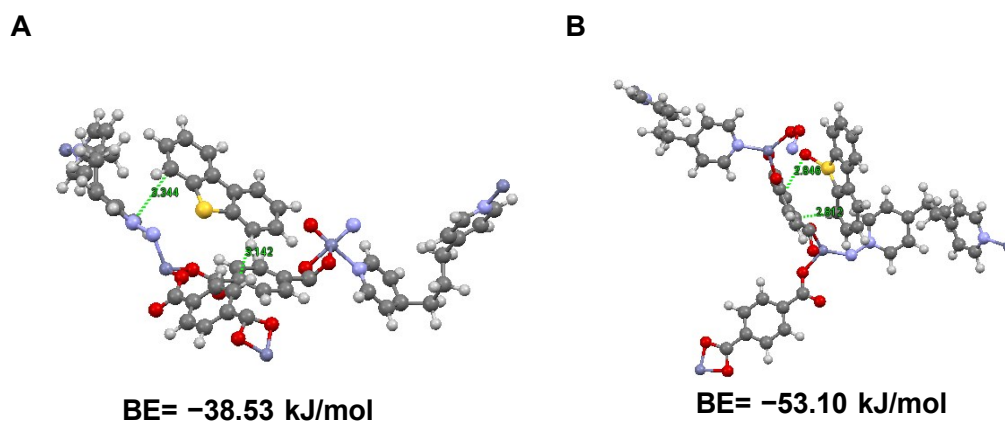

**Fig. S17.** Adsorption interaction conformations and binding energies (BEs) of (a) DBT and (b) DBTO with  $[\text{Zn}(\text{TDPA})_2(\text{TMPy})_2]_n$ .

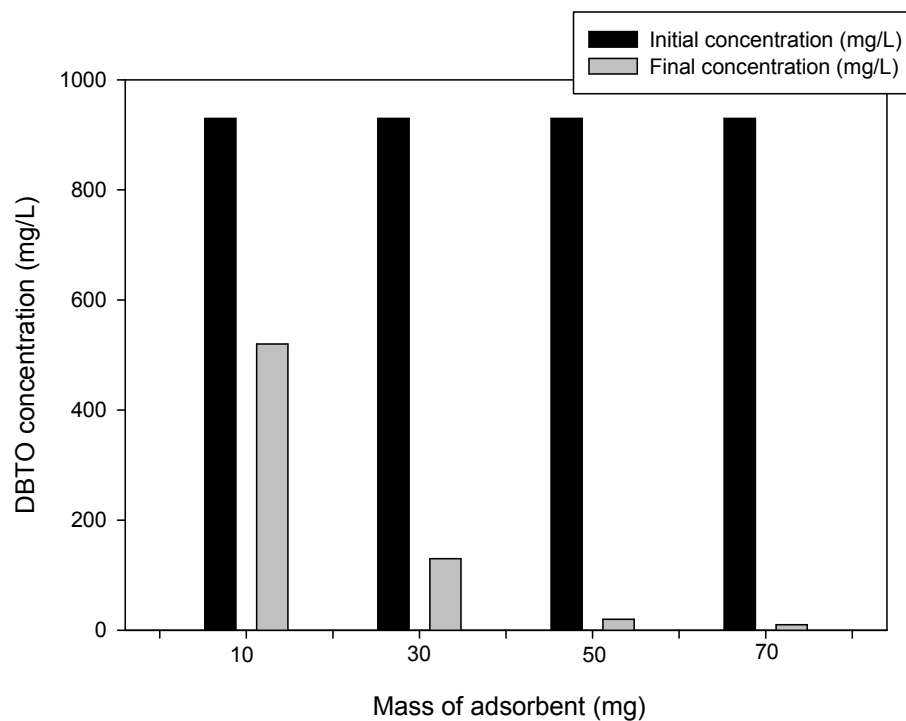

**Fig. S18.** (A) Amount of DBTO adsorbed by varying adsorbent mass ( $[\text{Zn}(\text{TDPA})_2(\text{TMPy})_2]_n$ ) at constant time of 24 h at 25°C.

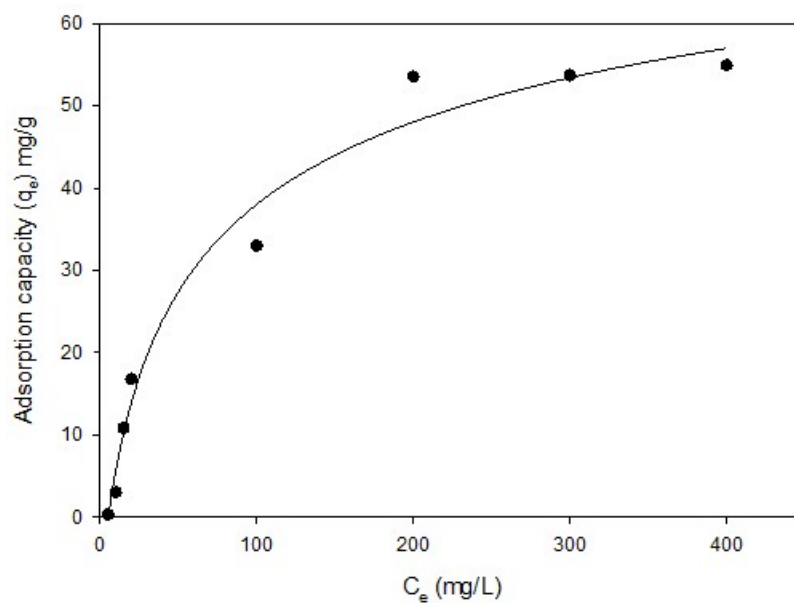

**Fig. S19.** Quantity of DBTO adsorbed by  $[\text{Zn}(\text{TDPA})_2(\text{TMPy})_2]_n$  at different concentrations at 25°C using 50 mg of adsorbent with a constant time of 24 h.



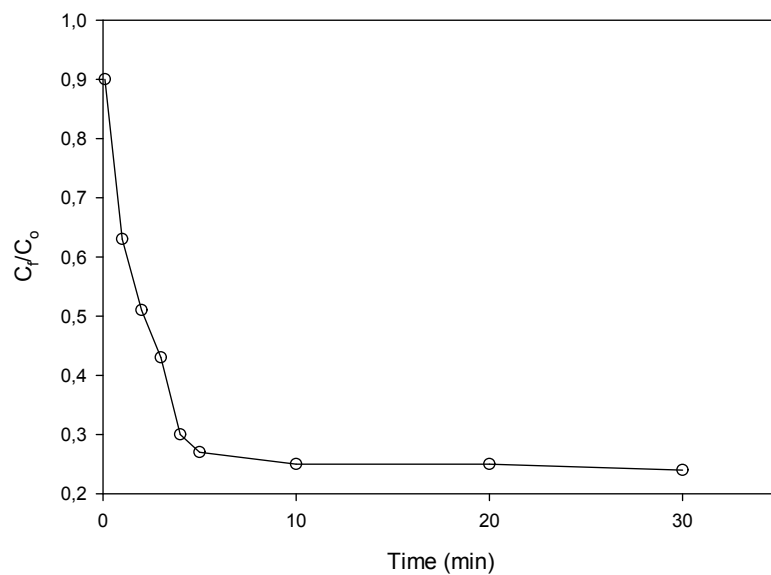

**Fig. S20.** Variation in DBTO concentrations by  $[\text{Zn}(\text{TDPA})_2(\text{TMPy})_2]_n$  adsorption as a function of time at  $25^\circ\text{C}$ , using 50 mg of adsorbent and 5 mL of 300 mg/L DBTO.

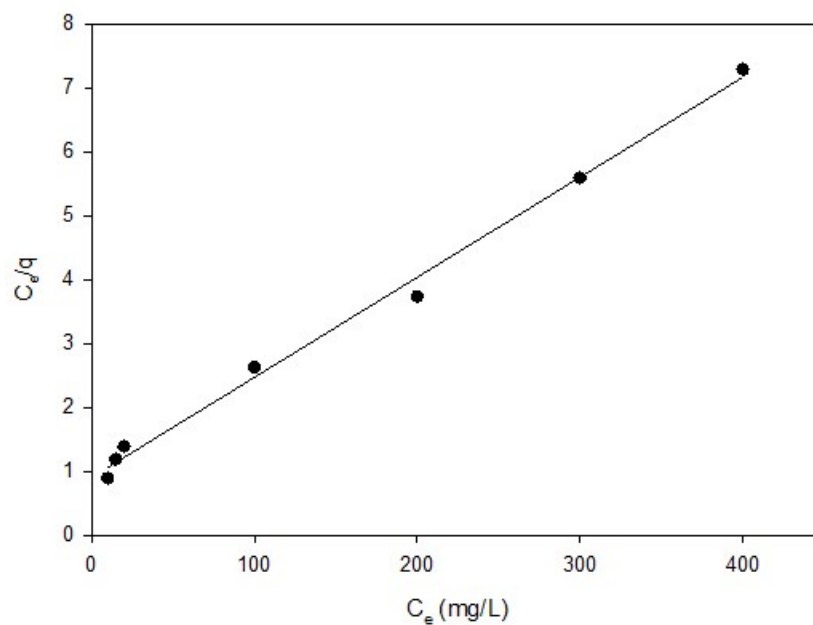

**Fig. S21.** Langmuir adsorption isotherms of DBTO over  $[\text{Zn}(\text{TDPA})_2(\text{TMPy})_2]_n$ .

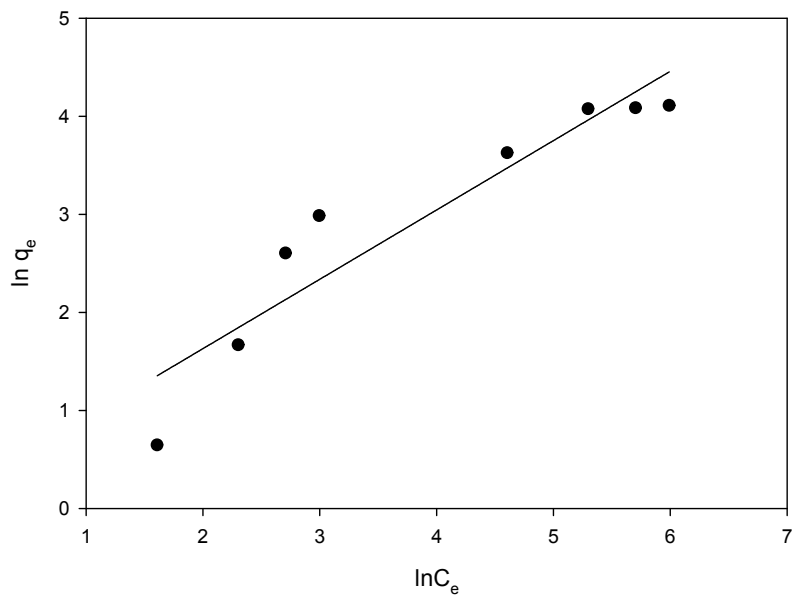

**Fig. S22** Freundlich adsorption isotherms of DBTO over  $[\text{Zn}(\text{TDPA})_2(\text{TMPy})_2]_n$ .

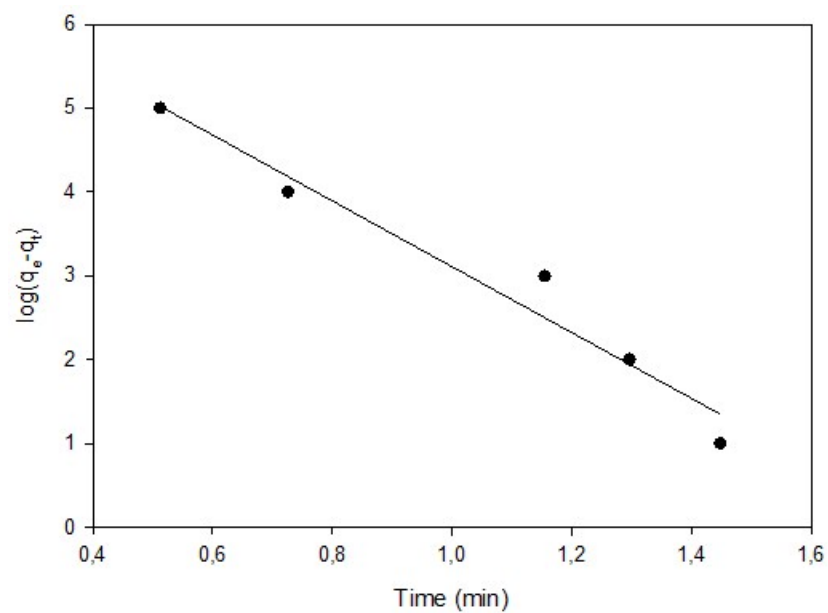

**Fig. S23** Graph of  $\log(q_e - q_t)$  vs. time

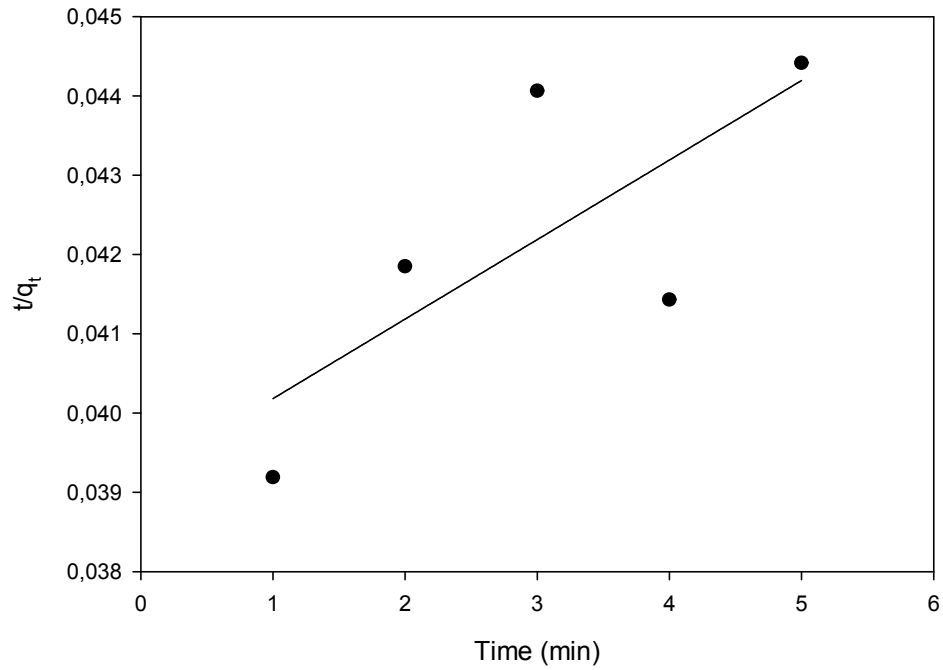

**Fig. S24** Graph of  $t/q_t$  vs. time

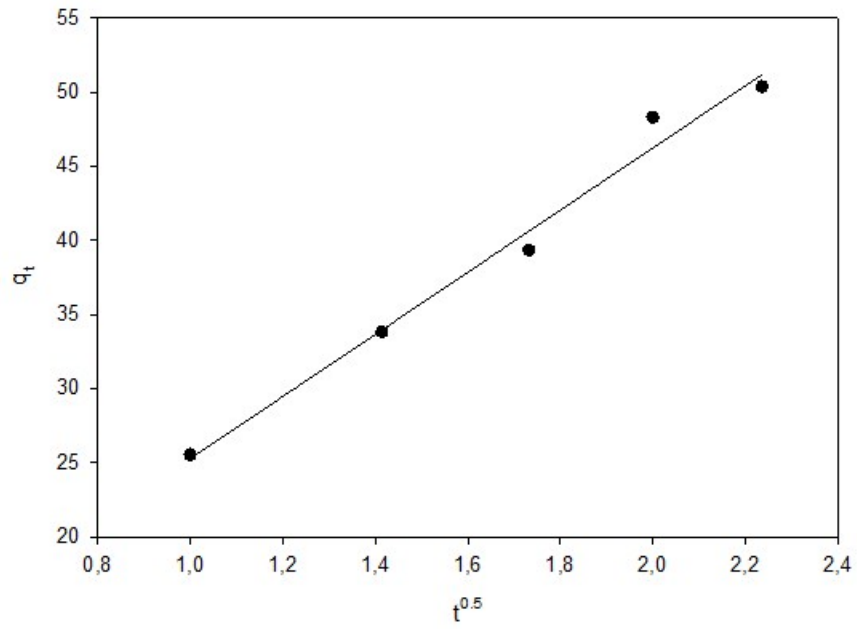

**Fig. S25.** Graph of  $q_t$  vs.  $time^{0.5}$

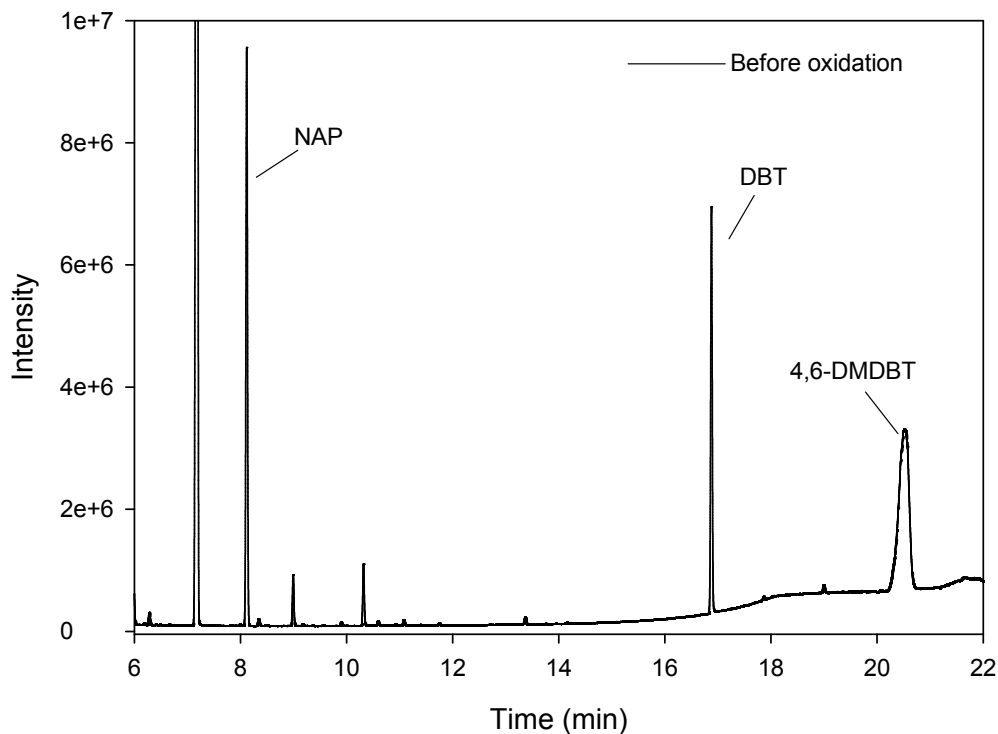

**Fig. S26:** GC-FID chromatograms of model fuel containing DBTO (930 mg/L), NAP (1000 mg/L), and 4,6-DMDBT (400 mg/L) in n-octane/acetonitrile mixture.

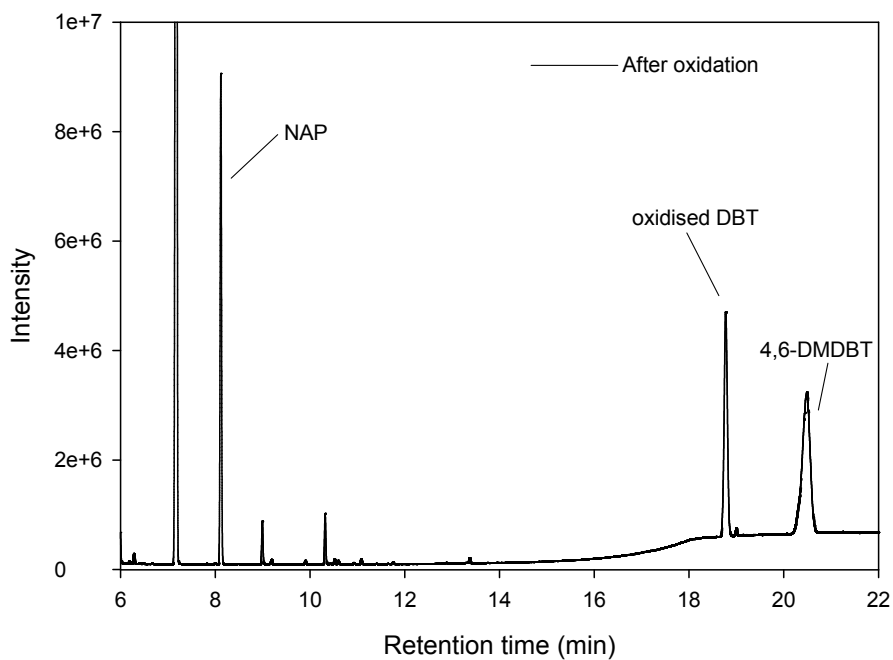

**Fig. S27:** GC-FID chromatograms of oxidized model fuel in n-octane/acetonitrile mixture (DBT (930 mg/L, 138 ppmS), 4,6-DMDBT (400 mg/L, 52.7 ppmS) and NAP (1000 mg/L)).

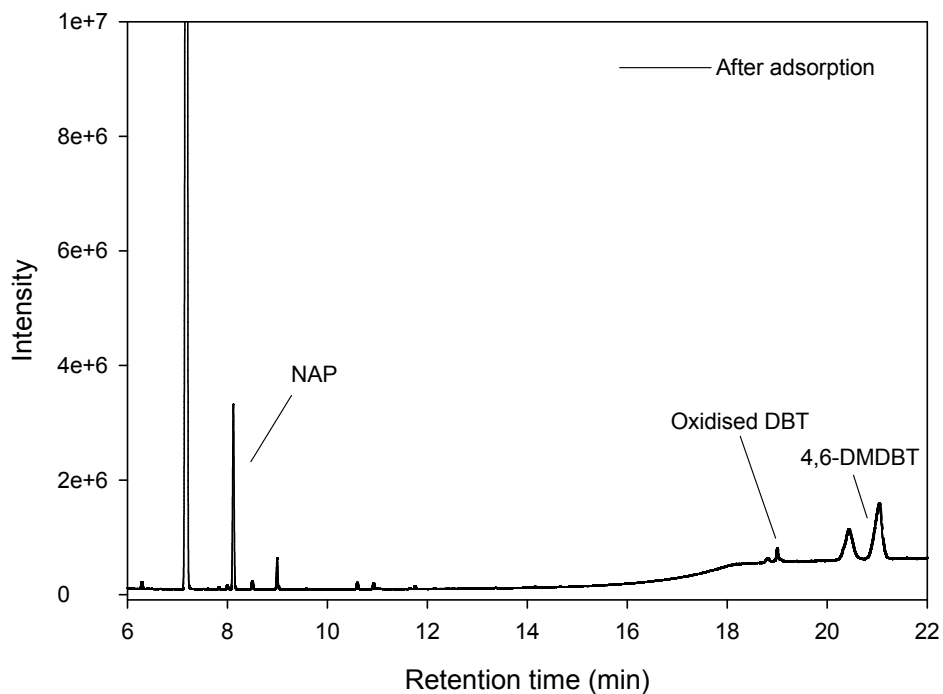

**Fig. S28:** GC-FID chromatograms of model fuel after adsorption (DBTO (101.37 mg/L, 15.1 ppmS), 4,6-DMDBT (188 mg/L, 24.8 ppmS) and NAP (640 mg/L)).

## References

- [1] S. Rajagopal, T.L. Grimm, D.J. Collins, R. Miranda, *J. Catal.* 137 (1992) 453–461.
- [2] A.D. Becke, *J. Chem. Phys.* 98 (1993) 5648-5652.
- [3] C. Lee, W. Yang, R.G. Parr, *Phys. Rev. B* 37 (1988) 785-789.
- [4] M.J. Frisch, G.W. Trucks, H.B. Schlegel, G.E. Scuseria, M.A. Robb, J.R. Cheeseman, G. Scalmani, V. Barone, B. Mennucci, G.A. Petersson, H. Nakatsuji, M. Caricato, X. Li, H.P. Hratchian, A.F. Izmaylov, J. Bloino, G. Zheng, J.L. Sonnenberg, M. Hada, M. Ehara, K. Toyota, R. Fukuda, J. Hasegawa, M. Ishida, T. Nakajima, Y. Honda, O. Kitao, H. Nakai, T. Vreven, J.A. Montgomery, Jr., J.E. Peralta, F. Ogliaro, M. Bearpark, J.J. Heyd, E. Brothers, K.N. Kudin, V.N. Staroverov, R. Kobayashi, J. Normand, K. Raghavachari, A. Rendell, J.C. Burant, S.S. Iyengar, J. Tomasi, M. Cossi, N. Rega, J.M. Millam, M. Klene, J.E. Knox, J.B. Cross, V. Bakken, C. Adamo, J. Jaramillo, R. Gomperts, R.E. Stratmann, O. Yazyev, A.J. Austin, R. Cammi, C. Pomelli, J.W. Ochterski, R.L. Martin, K. Morokuma, V.G. Zakrzewski, G.A. Voth, P. Salvador, J.J. Dannenberg, S. Dapprich, A.D. Daniels, Ö. Farkas, J.B. Foresman, J.V. Ortiz, J. Cioslowski, and D.J. Fox, *Gaussian 09*, Revision D.01. Gaussian Inc., Wallingford CT, 2009.
